1 Evolution along allometric lines of least resistance: Morphological  
2 differentiation in *Pristurus* geckos  
3

4 **Héctor Tejero-Cicuéndez<sup>1,\*</sup>, Iris Menéndez<sup>2</sup>, Adrián Talavera<sup>1</sup>, Gabriel Riaño<sup>1</sup>,**  
5 **Bernat Burriel-Carranza<sup>1</sup>, Marc Simó-Riudalbas<sup>1</sup>, Salvador Carranza<sup>1</sup>, and Dean C.**  
6 **Adams<sup>3</sup>**

7 28 noviembre, 2022

8 <sup>1</sup>Institute of Evolutionary Biology (CSIC-Universitat Pompeu Fabra), Passeig Marítim de la  
9 Barceloneta 37-49, Barcelona 08003, Spain

10 <sup>2</sup>Museum für Naturkunde, Leibniz Institute for Evolution and Biodiversity Science, Berlin, Ger-  
11 many

12 <sup>3</sup>Department of Ecology, Evolution, and Organismal Biology, Iowa State University, Ames, Iowa,  
13 50010 USA

14 \*Correspondence: Héctor Tejero-Cicuéndez [cicuendez93@gmail.com](mailto:cicuendez93@gmail.com)

## 15 **Abstract**

16 Species living in distinct habitats often experience unique ecological selective pressures, which  
17 can drive phenotypic divergence. However, how ecophenotypic patterns are affected by allometric  
18 trends and trait integration levels is less well understood. Here we evaluate the role of allometry  
19 in shaping body size and shape diversity in *Pristurus* geckos utilizing differing habitats. We found  
20 that patterns of body shape allometry and integration were distinct in species with different habitat  
21 preferences, with ground-dwelling *Pristurus* displaying the most divergent allometric trend and  
22 the strongest integration. There was also strong concordance between static allometry across  
23 individuals and evolutionary allometry among species, revealing that body shape differences among  
24 individuals were predictive of evolutionary changes across the phylogeny at macroevolutionary  
25 scales. This suggested that phenotypic evolution occurred along allometric lines of least resistance,  
26 with allometric trajectories imposing a strong influence on the magnitude and direction of size and  
27 shape changes across the phylogeny. When viewed in phylomorphospace, the largest rock-dwelling  
28 species were most similar in body shape to the smallest ground-dwelling species, and vice versa.  
29 Thus, in *Pristurus*, phenotypic evolution along the differing habitat-based allometric trajectories  
30 resulted in similar body shapes at differing body sizes in distinct ecological habitats.

## 31 1. Introduction

32 Understanding how phenotypic diversity evolves, and elucidating the forces that generate and  
33 maintain this diversity, are major goals in evolutionary biology. Because adaptive evolution is the  
34 product of natural selection, changes in ecological selection pressures are expected to affect the  
35 evolutionary trajectory of phenotypic traits that facilitate an organism's survival in their habitat.  
36 Evolutionary theory predicts that differing habitats will exert unique ecological selection pressures  
37 on organisms, resulting in associations between ecological and phenotypic traits. Indeed, species  
38 inhabiting differing habitats often display functional, behavioral, or phenotypic differences, that  
39 have presumably been the result of adaptive diversification in their respective ecological contexts  
40 [1–5].

41  
42 One possible evolutionary outcome of ecological specialization is that organisms inhabiting  
43 similar environments display common phenotypic characteristics. When such patterns occur  
44 repeatedly [6,7], this convergent evolution is treated as strong evidence of adaptation. Indeed the  
45 ecomorphological paradigm [8] is predicated, in part, on such cases, which emphasize the strong  
46 association between the phenotypic traits that organisms display (morphological, behavioral,  
47 or physiological) and the ecological characteristics of their habitat that mediate organismal  
48 performance. In vertebrates, ecomorphological trends have been well studied in numerous  
49 taxonomic groups, and include the emblematic 'ecomorphs' of Caribbean *Anolis* lizards that  
50 exploit different microhabitats [6,9,10], differential beak morphology in species of Darwin's finches  
51 [11–13], the recurring phenotypes of African lake cichlids across ecological regimes [14,15], and  
52 the distinct body forms of freshwater fishes in benthic and limnetic habitats [16–18], among others.

53  
54 However, while the patterns of morphological differences in distinct ecological contexts have been  
55 well documented, less-well understood is how this differentiation has been influenced by trait  
56 covariation associated with body size differences (i.e., allometry). Evaluating allometric trends  
57 across hierarchical levels (e.g., comparing allometry at the individual level, or static allometry,  
58 and among species, or evolutionary allometry) may aid in our understanding of how adaptive

59 morphological change occurs at macroevolutionary scales [19]. It has long been recognized that the  
60 interrelationships among traits can exert a strong influence on how phenotypic evolution proceeds,  
61 as trait correlations influence the degree to which phenotypic variation is exposed to selection  
62 [20]. Thus, the integration among traits can constrain phenotypic change in certain directions,  
63 or enhance variation along other phenotypic axes [20–27]. Further, because nearly all linear  
64 traits covary strongly with overall body size [28,29], allometric trends could be considered the  
65 quintessential expression of phenotypic integration. Thus, identifying whether allometric patterns  
66 differ across habitats, and how such patterns of trait covariation affect ecomorphological trends  
67 among species utilizing those habitats, remains an important question worthy of investigation.

68

69 The Afro-Arabian geckos in the genus *Pristurus* afford the opportunity to elucidate the inter-  
70 digitating effects of allometry and habitat specialization on clade-level patterns of phenotypic  
71 diversity. Prior work on this system [30] revealed that the colonization of ground habitats has  
72 been a trigger of morphological change, specifically reflected in an increase in body size and shape  
73 disparity. Interestingly, some ground-dwelling species are among the largest of the genus and  
74 also show increased relative head sizes and limb proportions, while some other species with this  
75 ecological specialization have evolved to be among the smallest of the group. Additionally, among  
76 the species exploiting rocky habitats (the most common ecological feature in *Pristurus*), there are  
77 also species with both considerably large and small body sizes [30]. What remains unexplored,  
78 however, is how the evolution of body shape is related to differences in body size and whether  
79 habitat specialization has an impact in this shape-size relationship.

80

81 In this study, we employed a combination of multivariate morphometric and phylogenetic com-  
82 parative analyses to interrogate macroevolutionary patterns of evolutionary allometry in *Pristurus*  
83 geckos of Afro-Arabia. Using phenotypic, phylogenetic, and ecological data, we first characterized  
84 allometric trends in body form in the group, to discern the extent to which evolutionary allometric  
85 trends across the phylogeny aligned with habitat-based static allometry for species occupying dis-  
86 tinct ecological regimes. We then examined changes in allometric trends across the phylogeny, and  
87 linked these patterns to overall phenotypic integration, diversification in morphospace, and habitat

88 utilization among taxa. Our analyses reveal that patterns of evolutionary allometry across species  
89 align with allometric trends within habitats, demonstrating that the interplay between ecological  
90 specialization and allometric trajectories in species with disparate body size may play a determinant  
91 role in shaping the phenotypic evolution and hence in adaptive dynamics in this clade.

## 92 **2. Materials and Methods**

### 93 **(a) Data**

94 We used a combination of phenotypic, phylogenetic, and ecological data to characterize and evalu-  
95 ate intra- and interspecific allometric trends. The data utilized here were obtained from our prior  
96 work on this system [30,31], and are briefly described here. First we used a time-dated, molecular  
97 phylogeny of squamates that included all members of the genus *Pristurus*, including several cur-  
98 rently undescribed taxa. The tree was estimated in a Bayesian framework, using five mitochondrial  
99 markers, six nuclear markers, and 21 calibration points [31]. Next we categorized each species as  
100 belonging to one of three ecological groups (ground, rock, or tree), based on descriptions of habitat  
101 use found in the literature [30]. Finally, we obtained a phenotypic data set containing body size  
102 (snout-vent length: SVL) and eight linear measurements (Figure 1) that described overall body  
103 form: trunk length (TL), head length (HL), head width (HW), head height (HH), humerus length  
104 (Lhu), ulna length (Lun), femur length (Lfe), and tibia length (Ltb) [30]. We restricted our study  
105 to those species represented by nine or more individuals; resulting in a dataset of 687 individuals  
106 from 25 species (individuals per species:  $\mu = 27$ ; min = 9, max = 56). Species in the phenotypic  
107 dataset were then matched to the phylogeny, which was subsequently pruned to the final topology.  
108 All measurements were log-transformed prior to statistical analyses. Additional details regarding  
109 data collection and formal descriptions of each linear measurement may be found in the original  
110 sources [30,31]. The data are available on DRYAD: <https://doi.org/10.5061/dryad.xwdbrv1f6> [32].

### 111 **(b) Statistical and Comparative Analyses**

112 We conducted a series of analyses to interrogate allometric trends, patterns of integration,  
113 and macroevolutionary changes in allometry, relative to differentiation in body form. First we

114 characterized evolutionary allometry in the genus by performing a phylogenetic multivariate  
115 regression of body form on body size (i.e., SVL), using the species means as data. We then  
116 performed an analogous procedure at the individual level, regressing body form on body size using  
117 our entire dataset. From both the species-level (phylogenetic) and the individual-level analyses, we  
118 obtained the set of regression coefficients, and calculated the difference in their angular direction  
119 to describe the extent to which patterns of allometry at the individual level were concordant with  
120 evolutionary allometric trends across species.

121

122 Next we used the dataset containing all individuals to determine whether trends in static allometry  
123 differed across habitat groups. This was accomplished by performing a multivariate analysis of  
124 covariance, with body size (*SVL*), *habitat*, and *SVL* × *habitat* as model effects. Significance  
125 was evaluated using 999 iterations of a permutation procedure, where residuals from a reduced  
126 model were randomly permuted in each permutation (RRPP), model statistics were recalculated,  
127 and used to generate empirical null sampling distributions to evaluate the observed test statistics  
128 [33–35]. We then compared the multivariate allometric vectors for each habitat group to one  
129 another, and to a vector representing multivariate isometry, by calculating pairwise differences  
130 in their angular direction in morphospace, and evaluating these relative to empirical sampling  
131 distributions obtained through RRPP [34,36,37]. Here, residuals were obtained from a common  
132 isometry reduced model, whose common slope component described a pattern of multivariate  
133 isometry, and whose intercepts allowed for differences in least-squares means among groups.  
134 Patterns of multivariate allometry relative to body size were visualized via regression scores [38]  
135 and predicted lines [39], based on the coefficients and fitted values from the linear model described  
136 above.

137

138 Additionally, because allometry describes the extent to which traits covary with body size and  
139 with each other (i.e., integration), we conducted an analysis of integration. Here we characterized  
140 the extent of morphological integration in body form for individuals within each habitat group  
141 by summarizing the dispersion of eigenvalues of their respective trait covariance matrix [40].  
142 This measure ( $V_{rel}$ ) was subsequently converted to an effect size (a *Z*-score), which quantified

143 the strength of morphological integration [41]. We then performed a series of two-sample  
144 tests to compare the strength of morphological integration across habitat groups, following the  
145 procedures of [41]. Additionally and for comparison, we repeated these analyses on the set of  
146 size-standardized trait data, found as a set of shape ratios [42] where each trait was divided by  
147 body size (Supplementary Material).

148

149 To determine the extent to which static and evolutionary allometry were concordant, we evaluated  
150 the directions in morphospace of both the evolutionary (species-level) and static (habitat-based)  
151 allometric trends. Specifically, we obtained the set of regression coefficients from both the  
152 phylogenetic multivariate regression and the multivariate analysis of covariance analyses above,  
153 and calculated the differences in angular direction between the evolutionary trajectory and the  
154 static allometry trend for each habitat group. The observed angles were then statistically evaluated  
155 relative to empirical sampling distributions obtained through permutation (RRPP), based on the  
156 common isometry model described above.

157

158 Next, to discern how allometric trends resulted in the evolution of distinct body forms, we  
159 examined changes in the body shape proportions across the phylogeny. Here we treated the head  
160 dimensions and limb dimensions separately, as allometric trends could potentially differ between  
161 these body regions due to differential functional or selective constraints [43]. Because both the  
162 head and limb data were multivariate, we first performed a partial least squares (PLS) analysis  
163 [44] of the head traits versus SVL, and the limb traits versus SVL, to describe the direction of  
164 maximal covariation between each body region and size. We then measured the mean residuals  
165 of each species to the inferred allometric trend, which described the extent to which head and  
166 limb proportions of species were greater or smaller than expected for their body size. The species  
167 residuals were then mapped on the phylogeny of *Pristurus* using a Brownian motion model of  
168 evolution, to qualitatively evaluate shifts in head and limbs proportionality across the phylogeny  
169 for the group. Similarly, within-species patterns of static allometry were visualized by plotting  
170 regressions of PLS scores on SVL for both head and limb traits separately.

171

172 Finally, to relate within-species allometric trends with patterns of phenotypic diversification in the  
173 group we generated a phylomorphospace, based on a phylogenetic principal component analyses  
174 (PCA) on the size-standardized species means obtained from a phylogenetic regression [30]. Here,  
175 phenotypic similarities among species, relative to their phylogenetic relationships and habitat af-  
176 filiations, were observed. Additionally, representative specimens (scaled to unit size) were also  
177 visually compared to aid in describing these trends. A similar phylomorphospace was constructed  
178 for species means not corrected for body size, and the phenotypic disparity among species means  
179 in each habitat was calculated and subsequently compared (Supplementary Material). All anal-  
180 yses were conducted in R 4.2.1 [45], using RRPP version 1.3.1 [46,47] and `geomorph` 4.0.4 [48] for  
181 statistical analyses and the `tidyverse` version 1.3.0 [49], `phytools` version 0.7-77 [50], and a mod-  
182 ified version of the function `ggphylomorpho` [<https://github.com/wabarr/ggphylomorpho>] for data  
183 manipulation and visualization, as well as scripts written by the authors (Supplementary Material).

### 184 3. Results

185 Using phylogenetic regression, we found significant evolutionary allometry in body form across  
186 species ( $N_{sp} = 25$ ;  $F = 217.9$ ;  $Z = 5.53$ ;  $P < 0.001$ ). Likewise, when allometry in body form  
187 was examined across individuals, a similar pattern was observed ( $N_{ind} = 687$ ;  $F = 7910.8$ ;  
188  $Z = 9.20$ ;  $P < 0.001$ ). Further, the vectors of regression coefficients between the two analyses  
189 were highly correlated ( $\rho = 0.94$ ) and were oriented in nearly parallel directions in morphospace  
190 ( $\theta = 1.49^\circ$ ). This revealed that the pattern of multivariate allometry across individuals was  
191 concordant with macroevolutionary trends of interspecific allometry among species of *Pristurus*  
192 across the phylogeny.

193

194 Our analyses also exposed significant differences in the allometry of body form among *Pristurus*  
195 utilizing distinct habitats (Table 1). Further, pairwise comparisons of multivariate allometric  
196 vectors revealed that patterns of static allometry in each habitat differed significantly from  
197 isometry, indicating the presence of multivariate allometry in each (Table 2). Additionally,  
198 comparisons identified that ground-dwelling *Pristurus* displayed the most distinct allometric



199 trend as compared with *Pristurus* occupying both the rock and tree habitats (Table 2; Figure  
200 2). Here, regression coefficients of each trait versus size (Supplementary Material) revealed that  
201 ground-dwelling *Pristurus* exhibited strong positive allometry for all head and limb traits (i.e.,  
202  $\beta > 1.0$ ). By contrast, rock and tree-dwelling *Pristurus* displayed negative allometry (i.e.,  $\beta < 1.0$ )  
203 for head traits, and were more varied for limb traits; with rock-dwelling *Pristurus* displaying  
204 positive limb allometry (though less extreme than that of ground-dwelling taxa), whereas most  
205 limb traits in tree-dwelling taxa showed negative allometry or near-isometry (Supplementary  
206 Material). Thus, these findings implied that larger individuals of ground-dwelling *Pristurus*  
207 species displayed disproportionately larger heads and limbs, as compared with large individuals  
208 in taxa utilizing other habitat types. Multivariate visualizations of these multivariate allometric  
209 trends (Figure 2) confirmed these statistical findings, and indicated that the allometric trajectory  
210 in ground-dwelling *Pristurus* was more extreme as compared with either rock- or tree-dwelling  
211 *Pristurus*.

212

213 Examination of patterns of trait covariation revealed strong levels of morphological integration  
214 within each habitat type ( $Z_{ground} = 3.97$ ;  $Z_{rock} = 3.72$ ;  $Z_{tree} = 2.15$ ). Further, two-sample tests  
215 revealed that the strength of morphological integration was significantly greater in ground-dwelling  
216 *Pristurus* than either those utilizing rock ( $Z_{ground-rock} = 6.59$ ;  $P \ll 0.001$ ) or tree habitats  
217 ( $Z_{ground-tree} = 11.17$ ;  $P \ll 0.001$ ). Arboreal *Pristurus* displayed the lowest levels of integration,  
218 which were also significantly lower than in the rock habitat ( $Z_{rock-tree} = 7.19$ ;  $P \ll 0.001$ ). When  
219 size was accounted for in the data, levels of integration dropped considerably, though the overall  
220 pattern and differences among habitat groups remained the same (Supplementary Material).

221

222 Comparisons of evolutionary allometry with static allometry in each habitat revealed substantial  
223 concordance between allometric trends at these hierarchical levels. Here, vectors of regression  
224 coefficients representing static allometry within habitat groups were oriented in very similar  
225 directions with the regression vector representing evolutionary allometry, with small pairwise  
226 angles between them ( $\theta : 2.3^\circ \rightarrow 5.9^\circ$ ). Subsequent permutation tests indicated no differences  
227 between the static allometry vectors and the regression vector representing evolutionary allometry,

228 indicating strong congruence between them (Table 3). Notably, static allometry in ground-dwelling  
229 *Pristurus* was most similar to trends of evolutionary allometry, displaying the smallest angular  
230 difference and largest effect size. Thus, static and evolutionary allometry trends were essentially  
231 parallel in this group, indicating a direct correspondence between the two. This result implied that  
232 phenotypic evolution across species aligned closely with directions of allometric variation within  
233 habitat groups at the individual level; namely that larger individuals and larger ground-dwelling  
234 species exhibited disproportionately larger heads and limbs, while smaller individuals and smaller  
235 ground-dwelling species displayed disproportionately smaller heads and limbs.

236

237 Mapping the residuals of species into the phylogeny showed that large ground-dwelling species  
238 displayed greater head proportions than large rock-dwelling species, who exhibited smaller  
239 heads relative to body size (Figure 3A). Conversely, the opposite pattern was observed when  
240 comparing small species utilizing these habitats: ground-dwelling species showed small relative  
241 head proportions while rock-dwelling species displayed generally larger head proportions. In  
242 contrast, limb shape showed more variable patterns. Although all large ground-dwelling species  
243 consistently displayed large relative limb proportions, large rock-dwelling species were more  
244 variable in this trait, with *P. insignis* exhibiting large and *P. insignoides* small limb propor-  
245 tions. For small species, shifts in relative limb proportions seemed more independent of habitat  
246 utilization, since there were differences in limb residuals both within rock- and ground-dwelling  
247 species (Figure 3B). Visual inspection of static allometry trends within species (Figure 4)  
248 largely confirmed these patterns, illustrating that ground-dwelling species generally displayed  
249 steeper allometric patterns in head proportions as compared with rock-dwelling species. Overall  
250 there was general concordance across taxa in terms of trends of multivariate allometry, affirming  
251 that the association between evolutionary allometry and habitat-based static allometry was robust.

252

253 Viewing body shape differentiation in *Pristurus* in phylomorphospace (Figure 5) revealed broad  
254 overlap among habitat groups, though arboreal (tree-dwelling) species were somewhat more  
255 separated in morphospace. Rock-dwelling species occupied a slightly larger region of morphospace  
256 as compared with the other groups, though this pattern was not statistically significant (Supple-

257 mentary Material). Intriguingly, when viewed in relation to body size, large *Pristurus* species  
258 were not localized to a particular region of morphospace, nor were smaller species. Instead, the  
259 largest rock-dwelling species were found in close proximity to the smallest ground-dwelling species,  
260 indicating that they were similar in overall body shape. Likewise, the smallest rock-dwelling  
261 species were found close to large ground-dwelling species in morphospace, indicating they displayed  
262 similar body shapes as well.

263

264 Finally, when representative specimens were scaled to a similar body size (Figure 6), the conse-  
265 quences of differences in allometric trends on body proportions became apparent. Here, larger  
266 ground-dwelling *Pristurus* species displayed disproportionately larger heads and limbs as compared  
267 with large *Pristurus* species utilizing other habitat types. Conversely, smaller rock-dwelling  
268 species were found to have disproportionately larger heads and limbs as compared with smaller  
269 ground-dwelling species. These patterns corresponded closely with those identified in morphospace  
270 (Figure 5), where large ground-dwelling species were similar in body form to small rock-dwelling  
271 species, while small ground-dwelling species were similar in body form to large rock-dwelling  
272 species (Figure 6). Thus, synthesizing the patterns revealed in the phylomorphospace with those  
273 from the other analyses revealed that the same body shape could be obtained in different ways,  
274 as determined by subtle differences in allometric slope across habitats, combined with body size  
275 differences. As such, species with similar body shapes displayed differing overall size, were found  
276 in distinct habitats, and exhibited different allometric trends.

277

## 278 4. Discussion

279 Elucidating the selective forces that generate patterns of phenotypic diversity is a major goal  
280 in evolutionary biology. For species that utilize distinct habitats, disentangling the causes of  
281 phenotypic differentiation across those habitats is essential for our understanding of how natural  
282 selection operates and how evolution proceeds. In this study, we evaluated the role of potential  
283 drivers of body shape differentiation in the geckos of the genus *Pristurus*. To this end, we

284 compared allometric trends and levels of integration among *Pristurus* occupying distinct habitats,  
285 interrogated allometric patterns at both the static and evolutionary levels, and related these trends  
286 to diversification in body form. Our findings have several important implications for how ecological  
287 specialization, phenotypic integration, and body form evolution along allometric trajectories relate  
288 to patterns of phenotypic diversity generally, and the evolution of phenotypic diversification in  
289 *Pristurus* in particular.

290

291 First, our analyses revealed that patterns of body shape allometry and morphological integration  
292 are relatively distinct in ground-dwelling *Pristurus* lizards, as compared with *Pristurus* occupying  
293 other habitats. Specifically, we found that multivariate vectors of regression coefficients differed  
294 significantly from what was expected under isometry (Table 2) for taxa utilizing all habitat  
295 types (ground, rock, tree), indicating that in *Pristurus*, allometric scaling patterns predominate.  
296 Further, our interrogation of allometric trends revealed differences between habitat types, where  
297 ground-dwelling *Pristurus* displayed steeper (i.e., positively allometric) trends for both head and  
298 limb traits, while rock and tree-dwelling taxa displayed shallower (negatively allometric) trends  
299 for head traits and more varied patterns for limb proportions. Biologically, these patterns revealed  
300 that not only does shape differ between large and small *Pristurus*, but this pattern differs across  
301 habitat types. Specifically, large ground-dwelling *Pristurus* present disproportionately larger  
302 heads and longer limbs relative to large individuals in other habitats, while small ground-dwelling  
303 *Pristurus* exhibit disproportionately smaller heads and shorter limbs (Figure 3). These findings  
304 are consistent with previous work at the macroevolutionary level [30], where large ground species  
305 were also found to display disproportionately large heads and long limbs.

306

307 Second, our findings revealed that rock-dwelling *Pristurus* show a converse pattern, where smaller  
308 individuals displayed relatively larger heads, while larger individuals have smaller heads relative to  
309 their body size. These allometric patterns also corresponded with findings at macroevolutionary  
310 scales [30], where similar patterns at the species level were observed. Regarding relative limb  
311 proportions, we found a high variability among small rock-dwelling species rather than a common  
312 pattern (Figure 3B). Indeed, earlier work in the subclade comprising several of these species

313 (the *P. rupestris* species complex) found two well-differentiated phenotypes in populations of  
314 these lineages segregated by elevation [51]. These two ecotypes, defined as ‘slender’ and ‘robust’,  
315 differed in their head and limb characteristics. Our work is consistent with this, and extends these  
316 patterns to the allometric realm. Tejero-Cicuéndez et al. [30] also performed habitat ancestral  
317 estimation, finding that the rock habitat was the most likely ancestral condition in the group,  
318 with subsequent colonization by *Pristurus* of ground habitats. When patterns of allometry are  
319 viewed through this lens, it suggests the hypothesis that habitat shifts from rock-dwelling to  
320 ground-dwelling incurred a concomitant evolutionary shift in allometric trajectories as well [39].  
321 Indeed, our analyses are consistent with this hypothesis, as allometric trends are inferred to be  
322 more rock-like towards the root of the *Pristurus* phylogeny (Figure 3), with subsequent shifts along  
323 branches leading to ground-dwelling species. This further suggests that the segregation in body  
324 size and shape through differential allometric relationships across habitats responds to adaptive  
325 dynamics concerning the colonization of new habitats. Thus, in *Pristurus*, there is support for the  
326 hypothesis that colonization of ground habitats has been a trigger for morphological change [30],  
327 as there appears to be a link between shifts in allometric trajectories as a result of habitat-induced  
328 selection, and differential patterns of body shape observed across taxa. More broadly, these  
329 findings are consistent with prior discoveries in other lizards, where the differential selective  
330 pressures imposed by rocky and ground habitats have resulted in the differentiation of head and  
331 limb morphology [43,51–53]. Indeed, such phenotypic differences resulting from the effects of  
332 habitat-based ecological selection have been extensively documented in reptiles as well as in other  
333 vertebrates [9,54–60], and our work in *Pristurus* thus contributes to this growing body of literature.

334

335 Another important finding of our study was the strong concordance between static allometry across  
336 individuals and evolutionary allometry among *Pristurus* species. Our analyses revealed small  
337 pairwise angles between static and evolutionary allometry vectors, indicating that allometric trends  
338 at these two hierarchical levels were oriented in similar directions and were essentially parallel.  
339 As such, size-associated changes in body shape among individuals were predictive of evolutionary  
340 shifts across taxa at higher macroevolutionary scales. This in turn, suggests that body shape  
341 evolution in *Pristurus* follows an allometric line of least resistance [61]. In other empirical systems,

342 a similarly tight correspondence between static and evolutionary allometry has also been observed  
343 [61–65], though the trend is not universal across all taxa or traits [19,66]. Nonetheless, when such  
344 trends are present, they imply that allometric trajectories impose a prevailing influence on the  
345 magnitude, direction, and rate of phenotypic change across the phylogeny. Our work in *Pristurus*  
346 contributes to the growing literature on this topic, and suggests that perhaps such patterns may  
347 be more widespread.

348

349 Given the observation that static and evolutionary allometry in *Pristurus* are so concordant, an  
350 obvious question is: why might this be the case? One possible explanation is that when genetic  
351 covariation remains relatively constant, selection on body size will generate an evolutionary allo-  
352 metric trajectory along the trend described by static allometry [67,68]. Here, allometry effectively  
353 acts as a constraint on evolutionary change, as size-associated shape changes at one hierarchical  
354 level are linked to changes at another level [63,66,69]. Further, when this is the case, one may also  
355 expect high levels of phenotypic integration in traits associated with body size changes. Indeed,  
356 our analyses reveal precisely this pattern in *Pristurus*, with the highest levels of integration in the  
357 group (ground-dwelling) whose static allometry is most similar to that of evolutionary allometry.  
358 Thus, our results reveal that patterns of trait covariation are more constrained in ground-dwelling  
359 species, such that their differences in body form are most likely found along the primary allometric  
360 axis. When viewed in this light, integration and allometry may thus be interpreted as potential  
361 drivers that facilitate morphological change, as they provide a phenotypic pathway through  
362 adaptive lines of least resistance that enable rapid evolutionary changes in particular phenotypic  
363 directions but not in others [22,27]. The fact that ground-dwelling species in *Pristurus* have been  
364 found to have the widest phenotypic disparity, greatest range of body sizes, and highest rates of  
365 morphological evolution [30] are all consistent with this hypothesis, and suggest that in this group,  
366 integration describes the path of morphological evolution along allometric lines of least resistance.

367

368 Finally, interpreting the observed patterns of phenotypic integration and allometry relative to  
369 habitat-specific differences helps to shed light on the possible pathways by which phenotypic diver-  
370 sity in *Pristurus* has evolved. For instance, prior work on this system [30] revealed that the coloniza-

371 tion of new ecological habitats elicited strong ecological selection and phenotypic responses. This  
372 was particularly true of the invasion of ground habitats, where ground-dwelling species displayed  
373 the largest variation in body size in the genus. This observation implies some level of ecological  
374 selection on body size. In lizards, the ecological context in which species exist is known to play a  
375 pervasive role in body size evolution [70–72], as it does in other animal groups [73–77]. While to  
376 date this has not been thoroughly explored in *Pristurus*, the evolutionary patterns revealed by our  
377 analyses suggest that the body size diversity in this clade conforms, at least in part, with patterns  
378 expected under ecological selection on body size. Intriguingly, such patterns are not only observed  
379 in ground- and rock-dwelling taxa, but also in arboreal species, whose restricted phenotypic di-  
380 versity in both size and shape (Figures 3 & 5) is consistent with strong ecological selection in the  
381 arboreal habit [78,79]. Furthermore, our study identified the presence of strong integration and  
382 allometric trajectories, such that evolutionary changes in body size elicit corresponding changes in  
383 body shape. However, these trends differed significantly across habitats, implying that, at evolu-  
384 tionary scales, these trends serve to channel phenotypic responses to selection, but do so in differing  
385 directions for the different habitat groups. This, in turn, suggests that *Pristurus* species occupying  
386 different habitats display differing combinations of body size with body shape. The evolutionary  
387 consequence of ecological selection is that species have evolved similar shapes (Figure 6), but do  
388 so in differing habitats, and at different body sizes (Figure 5). Therefore, the phenotypic diversity  
389 observed in *Pristurus* is best explained as the result of a complex interplay between ecological  
390 selection, body size differentiation, and differing allometric trajectories across ecological habitats.

## 391 References

- 392 1. Collar DC, Schulte JA, O'Meara BC, Losos JB. 2010 Habitat use affects morphological diversifi-  
393 cation in dragon lizards. *Journal of Evolutionary Biology* **23**, 1033–1049. (doi:10.1111/j.1420-  
394 9101.2010.01971.x)
- 395 2. Kaliontzopoulou A, Carretero MA, Adams DC. 2015 Ecomorphological variation in male and  
396 female wall lizards and the macroevolution of sexual dimorphism in relation to habitat use.  
397 *Journal of Evolutionary Biology* **28**, 80–94. (doi:10.1111/jeb.12540)
- 398 3. Price SA, Friedman ST, Wainwright PC. 2015 How predation shaped fish: The impact of fin  
399 spines on body form evolution across teleosts. *Proceedings of the Royal Society B: Biological*  
400 *Sciences* **282**, 20151428. (doi:10.1098/rspb.2015.1428)
- 401 4. Martinez CM, Friedman ST, Corn KA, Larouche O, Price SA, Wainwright PC. 2021  
402 The deep sea is a hot spot of fish body shape evolution. *Ecology Letters* **24**, 1788–1799.  
403 (doi:10.1111/ele.13785)
- 404 5. Kolmann MA, Marques FPL, Weaver JC, Dean MN, Fontenelle JP, Lovejoy NR. 2022 Ecological  
405 and phenotypic diversification after a continental invasion in neotropical freshwater stingrays.  
406 *Integrative and Comparative Biology* **62**, 424–440. (doi:10.1093/icb/icac019)
- 407 6. Losos JB. 1992 The evolution of convergent structure in Caribbean *Anolis* communities. *Sys-*  
408 *tematic Biology* **41**, 403–420. (doi:10.1093/sysbio/41.4.403)
- 409 7. Schluter D, McPhail JD. 1992 Ecological character displacement and speciation in sticklebacks.  
410 *The American Naturalist* **140**, 85–108. (doi:10.1086/285404)
- 411 8. Arnold SJ. 1983 Morphology, performance, fitness. *American Zoologist* **23**, 347–361.  
412 (doi:10.1093/icb/23.2.347)
- 413 9. Losos JB. 2009 *Lizards in an evolutionary tree: Ecology and adaptive radiation of anoles*.  
414 University of California Press.
- 415 10. Mahler DL, Ingram T, Revell LJ, Losos JB. 2013 Exceptional convergence on the macroevolu-



- 416        tionary landscape in island lizard radiations. *Science* **341**, 292–295. (doi:10.1126/science.1232392)
- 417 11. Schluter D, Grant PR. 1984 Determinants of morphological patterns in communities of Darwins  
418 finches. *The American Naturalist* **123**, 175–196. (doi:10.1086/284196)
- 419 12. Grant PR, Grant BR. 2006 Evolution of character displacement in darwin’s finches. *Science*  
420 **313**, 224–226. (doi:10.1126/science.1128374)
- 421 13. Reaney AM, Bouchenak-Khelladi Y, Tobias JA, Abzhanov A. 2020 Ecological and morpholog-  
422 ical determinants of evolutionary diversification in Darwins finches and their relatives. *Ecology*  
423 *and Evolution* **10**, 14020–14032. (doi:10.1002/ece3.6994)
- 424 14. Albertson RC, Kocher TD. 2001 Assessing morphological differences in an adaptive trait:  
425 A landmark-based morphometric approach. *Journal of Experimental Zoology* **289**, 385–403.  
426 (doi:10.1002/jez.1020)
- 427 15. Urban S, Gerwin J, Hulsey CD, Meyer A, Kratochwil CF. 2022 The repeated evolution of stripe  
428 patterns is correlated with body morphology in the adaptive radiations of East African cichlid  
429 fishes. *Ecology and Evolution* **12**, e8568. (doi:10.1002/ece3.8568)
- 430 16. Jastrebski CJ, Robinson BW. 2004 Natural selection and the evolution of replicated trophic  
431 polymorphisms in pumpkinseed sunfish (*Lepomis gibbosus*). *Evolutionary Ecology Research* **6**,  
432 285–305.
- 433 17. Berner D, Adams DC, Grandchamp A-C, Hendry AP. 2008 Natural selection drives patterns  
434 of lake-stream divergence in stickleback foraging morphology. *Journal of Evolutionary Biology*  
435 **21**, 1653–1665. (doi:10.1111/j.1420-9101.2008.01583.x)
- 436 18. Stuart YE *et al.* 2017 Contrasting effects of environment and genetics generate a continuum  
437 of parallel evolution. *Nature Ecology and Evolution* **1**, 158. (doi:10.1038/s41559-017-0158)
- 438 19. Klingenberg CP, Zimmermann M. 1992 Static, ontogenetic, and evolutionary allometry: A  
439 multivariate comparison in nine species of water striders. *American Naturalist* **140**, 601–620.  
440 (doi:10.1086/285430)
- 441 20. Wagner G, Altenberg L. 1996 Perspective: Complex adaptations and the evolution of evolu-

- 442 ability. *Evolution* **50**, 967–976. (doi:10.1111/j.1558-5646.1996.tb02339.x)
- 443 21. Schluter D. 1996 Adaptive radiation along genetic lines of least resistance. *Evolution* **50**,  
444 1766–1774. (doi:10.1111/j.1558-5646.1996.tb03563.x)
- 445 22. Felice RN, Randau M, Goswami A. 2018 A fly in a tube: Macroevolutionary expectations for  
446 integrated phenotypes. *Evolution* **72**, 2580–2594. (doi:10.1111/evo.13608)
- 447 23. Wagner GP, Zhang J. 2011 The pleiotropic structure of the genotype-phenotype map: The evolu-  
448 tion of complex organisms. *Nature Reviews Genetics* **12**, 204–213. (doi:10.1038/nrg2949)
- 449 24. Klingenberg CP, Marugán-Lobón J. 2013 Evolutionary covariation in geometric morphometric  
450 data: Analyzing integration, modularity, and allometry in a phylogenetic context. *Systematic*  
451 *Biology* **62**, 591–610. (doi:10.1093/sysbio/syt025)
- 452 25. Goswami A, Smaers JB, Soligo C, Polly PD. 2014 The macroevolutionary consequences of  
453 phenotypic integration: From development to deep time. *Philosophical Transactions of the*  
454 *Royal Society B: Biological Sciences* **369**, 20130254. (doi:10.1098/rstb.2013.0254)
- 455 26. Goswami A, Randau M, Polly PD, Weisbecker V, Verity Bennett C, Hautier L, Sánchez-  
456 Villagra MR. 2016 Do developmental constraints and high integration limit the evolution  
457 of the marsupial oral apparatus? *Integrative and Comparative Biology* **56**, 404–415.  
458 (doi:10.1093/icb/icw039)
- 459 27. Navalón G, Marugán-Lobón J, Bright JA, Cooney CR, Rayfield EJ. 2020 The consequences  
460 of craniofacial integration for the adaptive radiations of Darwin’s finches and Hawaiian honey-  
461 creepers. *Nature Ecology & Evolution* **4**, 270–278. (doi:10.1038/s41559-019-1092-y)
- 462 28. Jolicoeur P. 1963 The multivariate generalization of the allometry equation. *Biometrics* **19**,  
463 497–499. (doi:10.2307/2527939)
- 464 29. Bookstein FL. 2022 Dimensions of morphological integration. *Evolutionary Biology* **49**, 342–  
465 372. (doi:10.1007/s11692-022-09574-0)
- 466 30. Tejero-Cicuéndez H, Simó-Riudalbas M, Menéndez I, Carranza S. 2021 Ecological specializa-  
467 tion, rather than the island effect, explains morphological diversification in an ancient ra-

- 468 diation of geckos. *Proceedings of the Royal Society B: Biological Sciences* **288**, 20211821.  
469 (doi:10.1098/rspb.2021.1821)
- 470 31. Tejero-Cicuéndez H, Patton AH, Caetano DS, Šmíd J, Harmon LJ, Carranza S. 2022 Recon-  
471 structing squamate biogeography in Afro-Arabia reveals the influence of a complex and dynamic  
472 geologic past. *Systematic Biology* **71**, 261–272.
- 473 32. Tejero-Cicuéndez H, Simó-Riudalbas M, Menéndez I, Carranza S. 2021 Ecological specialization,  
474 rather than the island effect, explains morphological diversification in an ancient radiation of  
475 geckos. Dryad digital repository. (Doi:10.5061/dryad.xwdbrv1f6).
- 476 33. Freedman D, Lane D. 1983 A nonstochastic interpretation of reported significance levels.  
477 *Journal of Business & Economic Statistics* **1**, 292–298. (doi:10.2307/1391660)
- 478 34. Collyer ML, Adams DC. 2007 Analysis of two-state multivariate phenotypic change in ecological  
479 studies. *Ecology* **88**, 683–692. (doi:10.1890/06-0727)
- 480 35. Collyer ML, Sekora DJ, Adams DC. 2015 A method for analysis of phenotypic change for phe-  
481 notypes described by high-dimensional data. *Heredity* **115**, 357–365. (doi:10.1038/hdy.2014.75)
- 482 36. Adams DC, Collyer ML. 2009 A general framework for the analysis of phenotypic trajectories  
483 in evolutionary studies. *Evolution* **63**, 1143–1154. (doi:10.1111/j.1558-5646.2009.00649.x)
- 484 37. Collyer ML, Adams DC. 2013 Phenotypic trajectory analysis: Comparison of shape change  
485 patterns in evolution and ecology. *Hystrix* **24**, 75–83. (doi:10.4404/hystrix-24.1-6298)
- 486 38. Drake AG, Klingenberg CP. 2008 The pace of morphological change: Historical transformation  
487 of skull shape in St Bernard dogs. *Proceedings of the Royal Society B: Biological Sciences* **275**,  
488 71–76. (doi:10.1098/rspb.2007.1169)
- 489 39. Adams DC, Nistri A. 2010 Ontogenetic convergence and evolution of foot morphology in  
490 European cave salamanders (Family: Plethodontidae). *BMC Evolutionary Biology* **10**, 1–10.  
491 (doi:10.1186/1471-2148-10-216)
- 492 40. Pavlicev M, Cheverud JM, Wagner GP. 2009 Measuring morphological integration using eigen-  
493 value variance. *Evolutionary Biology* **36**, 157–170. (doi:10.1007/s11692-008-9042-7)

- 494 41. Conaway MA, Adams DC. 2022 An effect size for comparing the strength of morphological  
495 integration across studies. *Evolution* **76**, 2244–2259. (doi:10.1111/evo.14595)
- 496 42. Mosimann JE. 1970 Size allometry: Size and shape variables with characterizations of the  
497 lognormal and generalized gamma distributions. *Journal of the American Statistical Association*  
498 **65**, 930–945. (doi:10.1080/01621459.1970.10481136)
- 499 43. Kaliontzopoulou A, Carretero MA, Llorente GA. 2010 Intraspecific ecomorphological vari-  
500 ation: Linear and geometric morphometrics reveal habitat-related patterns within *Podarcis*  
501 *bocagei* wall lizards. *Journal of Evolutionary Biology* **23**, 1234–1244. (doi:10.1111/j.1420-  
502 9101.2010.01984.x)
- 503 44. Rohlf FJ, Corti M. 2000 Use of two-block partial least-squares to study covariation in shape.  
504 *Systematic Biology* **49**, 740–753. (doi:10.1080/106351500750049806)
- 505 45. R Core Team. 2022 *R: A language and environment for statistical computing. Version 4.2.1.*  
506 Vienna, Austria: R Foundation for Statistical Computing. See <https://www.R-project.org/>.
- 507 46. Collyer ML, Adams DC. 2018 RRPP: An R package for fitting linear models to high-  
508 dimensional data using residual randomization. *Methods in Ecology and Evolution* **9**,  
509 1772–1779. (doi:10.1111/2041-210X.13029)
- 510 47. Collyer ML, Adams DC. 2022 *R: RRPP: Linear model evaluation with randomized residuals in a*  
511 *permutation procedure. Vsn. 1.3.1.* Vienna, Austria: R Foundation for Statistical Computing.  
512 See <https://CRAN.R-project.org/package=RRPP>.
- 513 48. Baken EK, Collyer ML, Kaliontzopoulou A, Adams DC. 2021 Geomorph 4.0 and gmShiny:  
514 Enhanced analytics and a new graphical interface for a comprehensive morphometric experience.  
515 *Methods in Ecology and Evolution* **12**, 2355–2363. (doi:10.1111/2041-210X.13723)
- 516 49. Wickham H *et al.* 2019 Welcome to the tidyverse. *Journal of Open Source Software* **4**, 1686.  
517 (doi:10.21105/joss.01686)
- 518 50. Revell LJ. 2012 Phytools: An R package for phylogenetic comparative biology (and other  
519 things). *Methods in Ecology and Evolution* **3**, 217–223. (doi:10.1111/j.2041-210X.2011.00169.x)

- 520 51. Garcia-Porta J, Simó-Riudalbas M, Robinson M, Carranza S. 2017 Diversification in arid moun-  
521 tains: Biogeography and cryptic diversity of *Pristurus rupestris rupestris* in Arabia. *Journal of*  
522 *Biogeography* **44**, 1694–1704. (doi:10.1111/jbi.12929)
- 523 52. Goodman BA, Miles DB, Schwarzkopf L. 2008 Life on the rocks: Habitat use drives morpho-  
524 logical and performance evolution in lizards. *Ecology* **89**, 3462–3471. (doi:10.1890/07-2093.1)
- 525 53. Foster KL, Garland T, Schmitz L, Higham TE. 2018 Skink ecomorphology: Forelimb and hind  
526 limb lengths, but not static stability, correlate with habitat use and demonstrate multiple solu-  
527 tions. *Biological Journal of the Linnean Society* **125**, 673–692. (doi:10.1093/biolinnean/bly146)
- 528 54. Busschau T, Boissinot S. 2022 Habitat determines convergent evolution of cephalic horns in  
529 vipers. *Biological Journal of the Linnean Society* **135**, 652–664. (doi:10.1093/biolinnean/blac008)
- 530 55. Hipsley CA, Müller J. 2017 Developmental dynamics of ecomorphological convergence in a  
531 transcontinental lizard radiation. *Evolution* **71**, 936–948. (doi:10.1111/evo.13186)
- 532 56. Watanabe A, Fabre AC, Felice RN, Maisano JA, Müller J, Herrel A, Goswami A. 2019 Ecomor-  
533 phological diversification in squamates from conserved pattern of cranial integration. *Proceed-*  
534 *ings of the National Academy of Sciences of the United States of America* **116**, 14688–14697.  
535 (doi:10.1073/pnas.1820967116)
- 536 57. Reynolds RG, Collar DC, Pasachnik SA, Niemiller ML, Puente-Rolón AR, Revell LJ. 2016  
537 Ecological specialization and morphological diversification in Greater Antillean boas. *Evolution*  
538 **70**, 1882–1895. (doi:10.1111/evo.12987)
- 539 58. Navalón G, Bjarnason A, Griffiths E, Benson RBJ. 2022 Environmental signal in the evolution-  
540 ary diversification of bird skeletons. *Nature* **611**, 306–311. (doi:10.1038/s41586-022-05372-y)
- 541 59. Samuels JX, Hopkins SSB. 2017 The impacts of Cenozoic climate and habitat changes  
542 on small mammal diversity of North America. *Global and Planetary Change* **149**, 36–52.  
543 (doi:10.1016/j.gloplacha.2016.12.014)
- 544 60. Friedman ST, Collyer ML, Price SA, Wainwright PC. 2022 Divergent Processes Drive  
545 Parallel Evolution in Marine and Freshwater Fishes. *Systematic biology* **71**, 1319–1330.

546 (doi:10.1093/sysbio/syab080)

- 547 61. Marroig G, Cheverud JM. 2005 Size as a line of least evolutionary resistance: Diet and adaptive  
548 morphological radiation in New World monkeys. *Evolution* **59**, 1128–1142. (doi:10.1111/j.0014-  
549 3820.2005.tb01049.x)
- 550 62. Firmat C, Lozano-Fernández I, Agustí J, Bolstad GH, Cuenca-Bescós G, Hansen TF, Pélabon  
551 C. 2014 Walk the line: 600000 years of molar evolution constrained by allometry in the fossil  
552 rodent *Mimomys savini*. *Philosophical Transactions of the Royal Society B: Biological Sciences*  
553 **369**, 20140057. (doi:10.1098/rstb.2014.0057)
- 554 63. Voje KL, Hansen TF, Egset CK, Bolstad GH, Pélabon C. 2014 Allometric constraints and the  
555 evolution of allometry. *Evolution* **68**, 866–885. (doi:10.1111/evo.12312)
- 556 64. Brombacher A, Wilson PA, Bailey I, Ezard THG. 2017 The breakdown of static and  
557 evolutionary allometries during climatic upheaval. *The American Naturalist* **190**, 350–362.  
558 (doi:10.1086/692570)
- 559 65. Marcy AE, Guillaume T, Sherratt E, Rowe KC, Phillips MJ, Weisbecker V. 2020 Australian ro-  
560 dents reveal conserved cranial evolutionary allometry across 10 million years of murid evolution.  
561 *The American Naturalist* **196**, 755–768. (doi:10.1086/711398)
- 562 66. Voje KL, Bell MA, Stuart YE. 2022 Evolution of static allometry and constraint on evo-  
563 lutionary allometry in a fossil stickleback. *Journal of Evolutionary Biology* **35**, 423–438.  
564 (doi:10.1111/jeb.13984)
- 565 67. Lande R. 1979 Quantitative genetic analysis of multivariate evolution, applied to brain-body  
566 size allometry. *Evolution* **33**, 402–416. (doi:10.2307/2407630)
- 567 68. Lande R. 1985 Size and scaling in primate biology. In (ed WL Jungers), pp. 21–32. Plenum  
568 Press.
- 569 69. Pélabon C, Bolstad GH, Egset CK, Cheverud JM, Pavlicev M, Rosenqvist G. 2014 On the  
570 relationship between ontogenetic and static allometry. *The American Naturalist* **181**, 195–212.  
571 (doi:10.1086/668820)

- 572 70. Meiri S. 2008 Evolution and ecology of lizard body sizes. *Global Ecology and Biogeography* **17**,  
573 724–734. (doi:10.1111/j.1466-8238.2008.00414.x)
- 574 71. James SE, M'closkey RT. 2004 Patterns of body size and habitat use in a lizard assemblage.  
575 *Ecoscience* **11**, 160–167. (doi:10.1080/11956860.2004.11682820)
- 576 72. Tamar K, Mitsi P, Simó-Riudalbas M, Tejero-Cicuéndez H, Al-Sariri T, Carranza S. 2019  
577 Systematics, biogeography, and evolution of *Pristurus minimus* (Squamata, Sphaerodactylidae)  
578 with the discovery of the smallest Arabian vertebrate. *Systematics and Biodiversity* **17**, 349–  
579 366. (doi:10.1080/14772000.2019.1614694)
- 580 73. Bergmann C. 1847 Über die verhältnisse der warmeökonomie der thiere zu ihrer grosse. *Göt-*  
581 *ttinger Studien* **1**, 595–708.
- 582 74. Calder WA. 1983 Ecological scaling: Mammals and birds. *Annual Review of Ecology and*  
583 *Systematics* **14**, 213–230. (doi:10.1146/annurev.es.14.110183.001241)
- 584 75. Peters RH. 1983 *The ecological implications of body size*. Cambridge University Press.
- 585 76. LaBarbera M. 1989 Analyzing body size as a factor in ecology and evolution. *Annual Review*  
586 *of Ecology and Systematics* **20**, 97–117. (doi:10.1146/annurev.es.20.110189.000525)
- 587 77. Olson VA, Davies RG, Orme CDL, Thomas GH, Meiri S, Blackburn TM, Gaston KJ, Owens  
588 IPF, Bennett PM. 2009 Global biogeography and ecology of body size in birds. *Ecology Letters*  
589 **12**, 249–259. (doi:10.1111/j.1461-0248.2009.01281.x)
- 590 78. Baken EK, Adams DC. 2019 Macroevolution of arboreality in salamanders. *Ecology and*  
591 *Evolution* **9**, 7005–7016. (doi:10.1002/ece3.5267)
- 592 79. Baken EK, Mellenthin LE, Adams DC. 2021 Is salamander arboreality limited by broad-scale  
593 climatic conditions? *PLoS ONE* **16**, e0255393. (doi:10.1371/journal.pone.0255393)

594

595

596 **Acknowledgments:** We are very grateful to J. Roca, M. Metallinou, K. Tamar, J. Šmíd, R.  
597 Vasconcelos, R. Sindaco, F. Amat, Ph. de Pous, L. Machado, J. Garcia-Porta, J. Els, T.  
598 Mazuch, T. Papenfuss, and all the people from the Environment Authority, Oman, for their  
599 help in different aspects of the work.

600 **Funding Statement:** This work was funded in part by PGC2018-098290-B-I00 (MCIU/AEI/FEDER,  
601 UE) and PID2021-128901NB-I00 (MCIN/AEI/10.13039/501100011033 and by ERDF, A way  
602 of making Europe), Spain to SC. IM was funded by the Alexander von Humboldt Foundation  
603 through a Humboldt Research Fellowship. AT is supported by the “la Caixa” doctoral  
604 fellowship programme (LCF/BQ/DR20/11790007). GR was funded by an FPI grant from the  
605 Ministerio de Ciencia, Innovación y Universidades, Spain (PRE2019-088729). BB-C was funded  
606 by FPU grant from Ministerio de Ciencia, Innovación y Universidades, Spain (FPU18/04742).  
607 DCA was funded in part by National Science Foundation Grant DBI-1902511.

608 **Data availability statement:** All the data used in this study are available on DRYAD from a  
609 previous study: <https://doi.org/10.5061/dryad.xwdbrv1f6> [32]. The scripts for implementing  
610 all analyses and generating the figures in this manuscript can be found in the Supplementary  
611 Material and in a GitHub repository (and on DRYAD upon acceptance).

612 **Competing interests:** The authors declare no competing interests.



Table 1: Multivariate analysis of covariance describing variation in body form in *Pristurus*.

|             | Df  | SS     | MS     | Rsqr | F        | Z    | Pr(>F) |
|-------------|-----|--------|--------|------|----------|------|--------|
| SVL         | 1   | 516.04 | 516.04 | 0.92 | 10188.70 | 9.49 | 0.001  |
| habitat     | 2   | 6.22   | 3.11   | 0.01 | 61.39    | 9.32 | 0.001  |
| SVL:habitat | 2   | 3.97   | 1.99   | 0.01 | 39.23    | 7.08 | 0.001  |
| Residuals   | 681 | 34.49  | 0.05   | 0.06 |          |      |        |
| Total       | 686 | 560.72 |        |      |          |      |        |

Table 2: Pairwise comparisons of multivariate static allometry for each habitat group. Comparisons with the vector of multivariate isometry are included. Displayed are: pairwise angular differences ( $\theta_{12}$ ), their associated effect sizes ( $Z_{\theta_{12}}$ ), and significance levels obtained via permutation (RRPP).

|                    | Ground | Rock   | Tree  | Isometry |
|--------------------|--------|--------|-------|----------|
| <b>Angle</b>       |        |        |       |          |
| Ground             | 0      |        |       |          |
| Rock               | 6.629  | 0      |       |          |
| Tree               | 8.095  | 3.628  | 0     |          |
| Isometry           | 5.034  | 5.901  | 7.189 | 0        |
| <b>Effect Size</b> |        |        |       |          |
| Ground             | 0      |        |       |          |
| Rock               | 7.004  | 0      |       |          |
| Tree               | 2.1    | -0.408 | 0     |          |
| Isometry           | 7.673  | 7.357  | 1.779 | 0        |
| <b>P-value</b>     |        |        |       |          |
| Ground             | 1      |        |       |          |
| Rock               | 0.001  | 1      |       |          |
| Tree               | 0.027  | 0.673  | 1     |          |
| Isometry           | 0.001  | 0.001  | 0.042 | 1        |

Table 3: Pairwise comparisons of multivariate evolutionary allometry versus static allometry for each habitat group. Pairwise angular differences between evolutionary and static allometry ( $\theta_{ES}$ ), their associated effect sizes ( $Z_{\theta_{ES}}$ ), and significance levels are displayed.

|                  | $\theta_{ES}$ | $Z_{\theta_{ES}}$ | P-value |
|------------------|---------------|-------------------|---------|
| Evol. vs. Ground | 2.37          | -4.26             | 1.000   |
| Evol. vs. Rock   | 4.55          | 0.87              | 0.191   |
| Evol. vs. Tree   | 5.96          | 0.21              | 0.405   |

## 613 **Figures**

614 Figure 1. Linear Measurements used in this study. SVL = snout-vent length, TL = trunk  
615 length, HL = head length, HW = head width, HH = head height, Lhu = humerus length, Lun  
616 = ulna length, Lfe = femur length, Ltb = tibia length [30].

617 Figure 2. Plot of regression scores and predicted lines representing the relationship between linear  
618 body measurements and size (SVL). Individuals are colored by habitat use: ground (beige),  
619 rock (dark purple), and tree (magenta). Isometric trend represented by the dashed line.

620 Figure 3. Traitgrams showing the evolution of body size (SVL) through time based on the phyloge-  
621 netic tree of *Pristurus*. Colors represent an evolutionary mapping of residuals from phylogenetic  
622 regressions describing the relationship of (A) head morphology versus body size, and (B) limb  
623 proportions versus body size (see text for descriptions). Species names are colored by habitat  
624 use: ground (beige), rock (dark purple), and tree (magenta).

625 Figure 4. Patterns of static allometry for each species for head traits (upper panel) and limb traits  
626 (lower panel). Species are separated by their habitat groups and colored by the magnitude of  
627 their regression slope (purple: steeper slopes, yellow: shallower slopes).

628 Figure 5. Phylomorphospace of *Pristurus*, based on residuals from a phylogenetic regression of  
629 body measurements on size (SVL). Species means are colored by habitat use: ground (beige),  
630 rock (dark purple), and tree (magenta). Large and small rock-dwelling and ground-dwelling  
631 are highlighted with darker colors to highlight their differentiation and relative positions in  
632 morphospace.

633 Figure 6. Representative specimens (based on real specimens) from large and small *Pristurus*  
634 species, colored by habitat use: ground (beige) and rock (dark purple). Specimens are scaled  
635 to a common body size (SVL, gray rectangles) to emphasize the relative differences in limb  
636 and head proportions. Relatively slender-headed and short-limbed species shown on the left.  
637 Original scale shown as the gray bar.

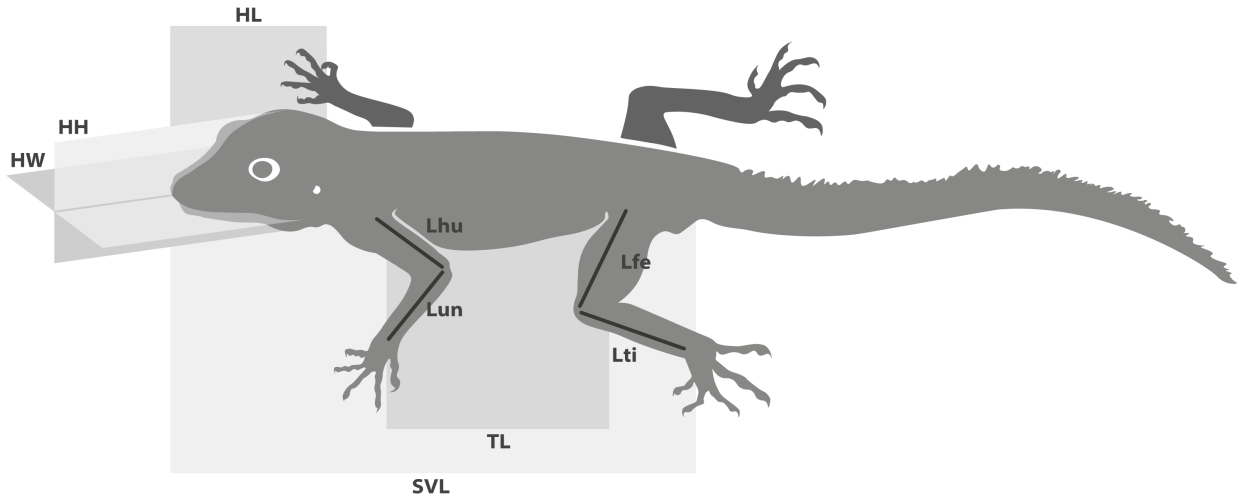

Figure 1: Linear Measurements used in this study. SVL = snout-vent length, TL = trunk length, HL = head length, HW = head width, HH = head height, Lhu = humerus length, Lun = ulna length, Lfe = femur length, Ltb = tibia length (for details see Tejero-Cicuéndez et al. 2021a).

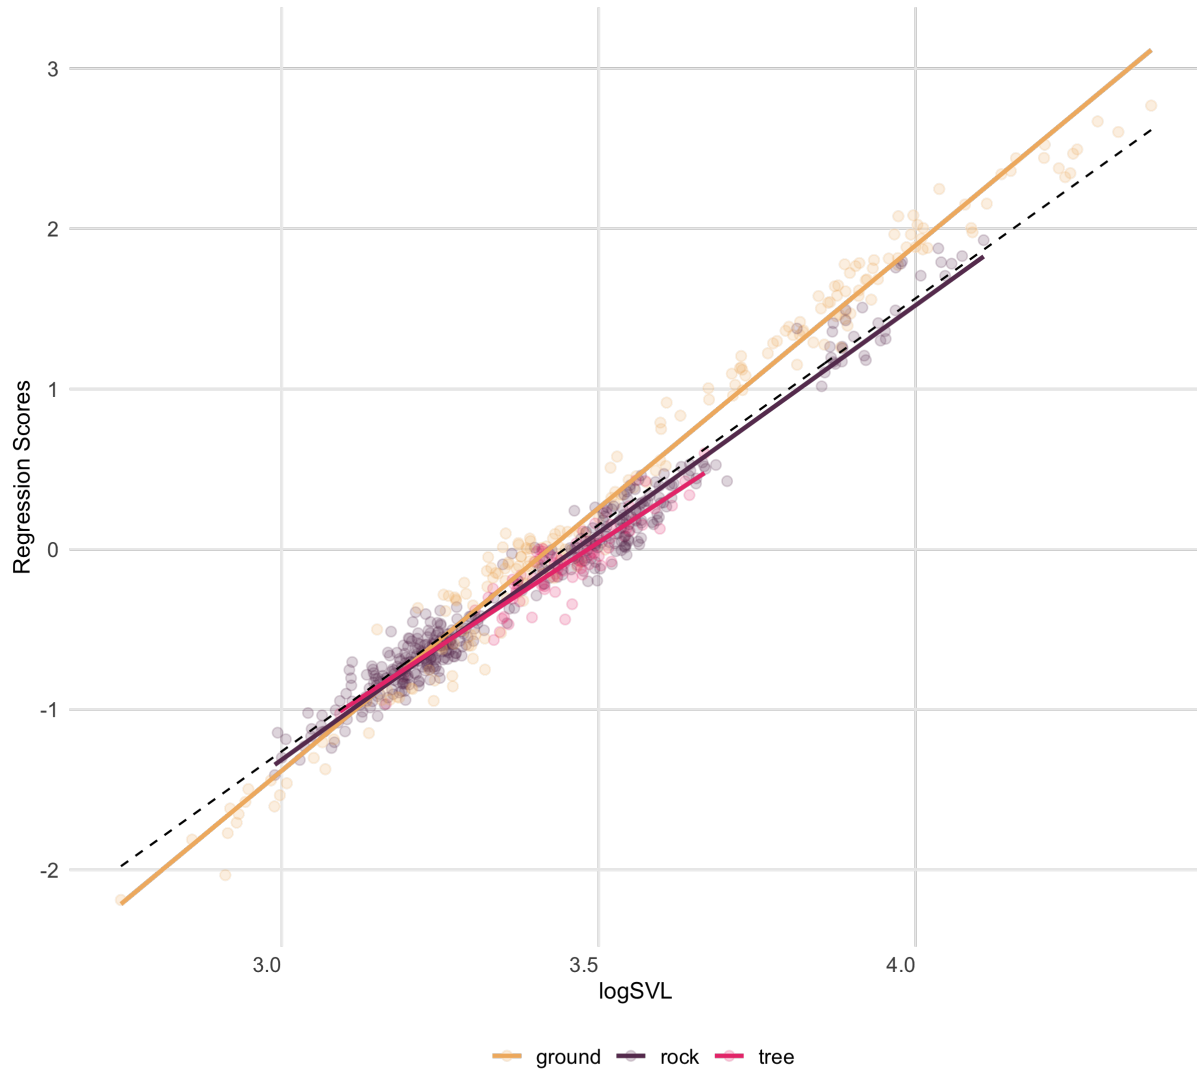

Figure 2: Plot of regression scores and predicted lines representing the relationship between linear body measurements and size (SVL). Individuals are colored by habitat use: ground (beige), rock (dark purple), and tree (magenta). Isometric trend represented by the dashed line.

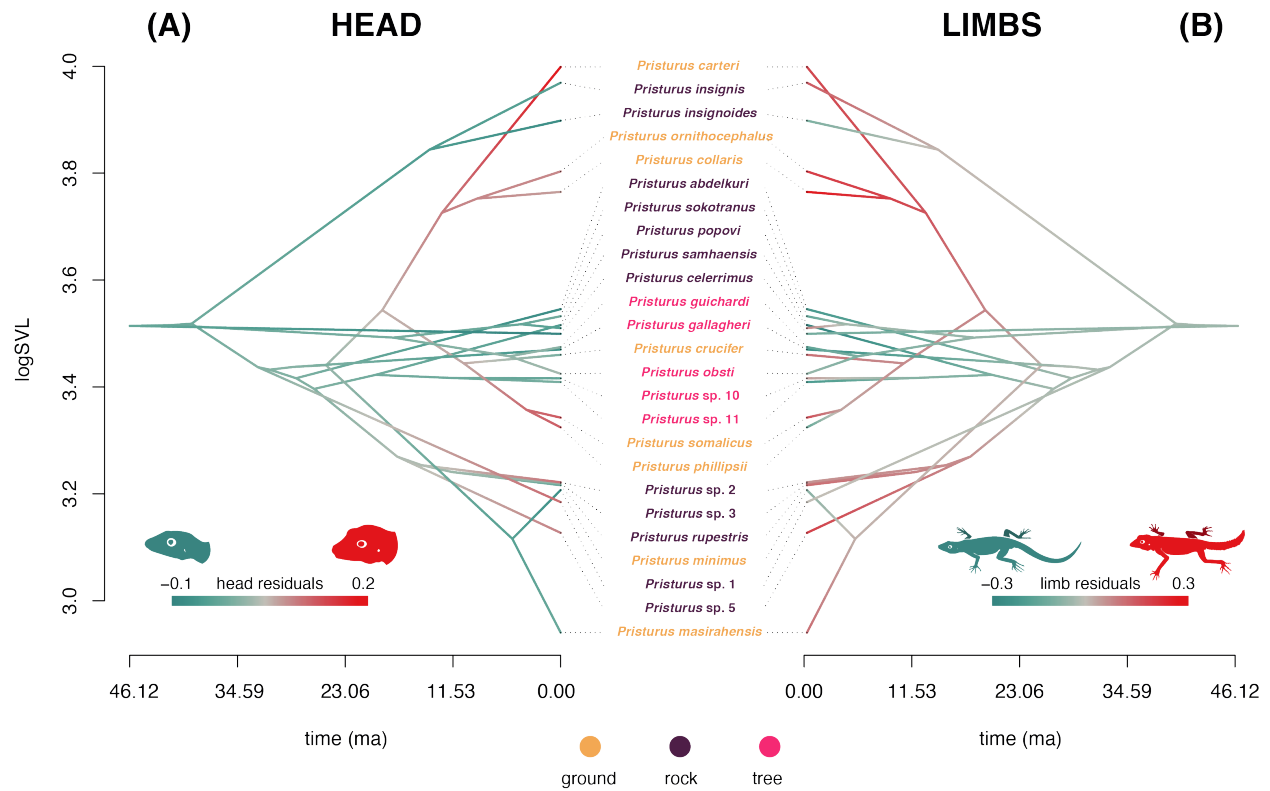

Figure 3: Traitgrams showing the evolution of body size (SVL) through time based on the phylogenetic tree of *Pristurus*. Colors represent an evolutionary mapping of residuals from phylogenetic regressions describing the relationship of (A) head morphology versus body size, and (B) limb proportions versus body size (see text for descriptions). Species names are colored by habitat use: ground (beige), rock (dark purple), and tree (magenta).

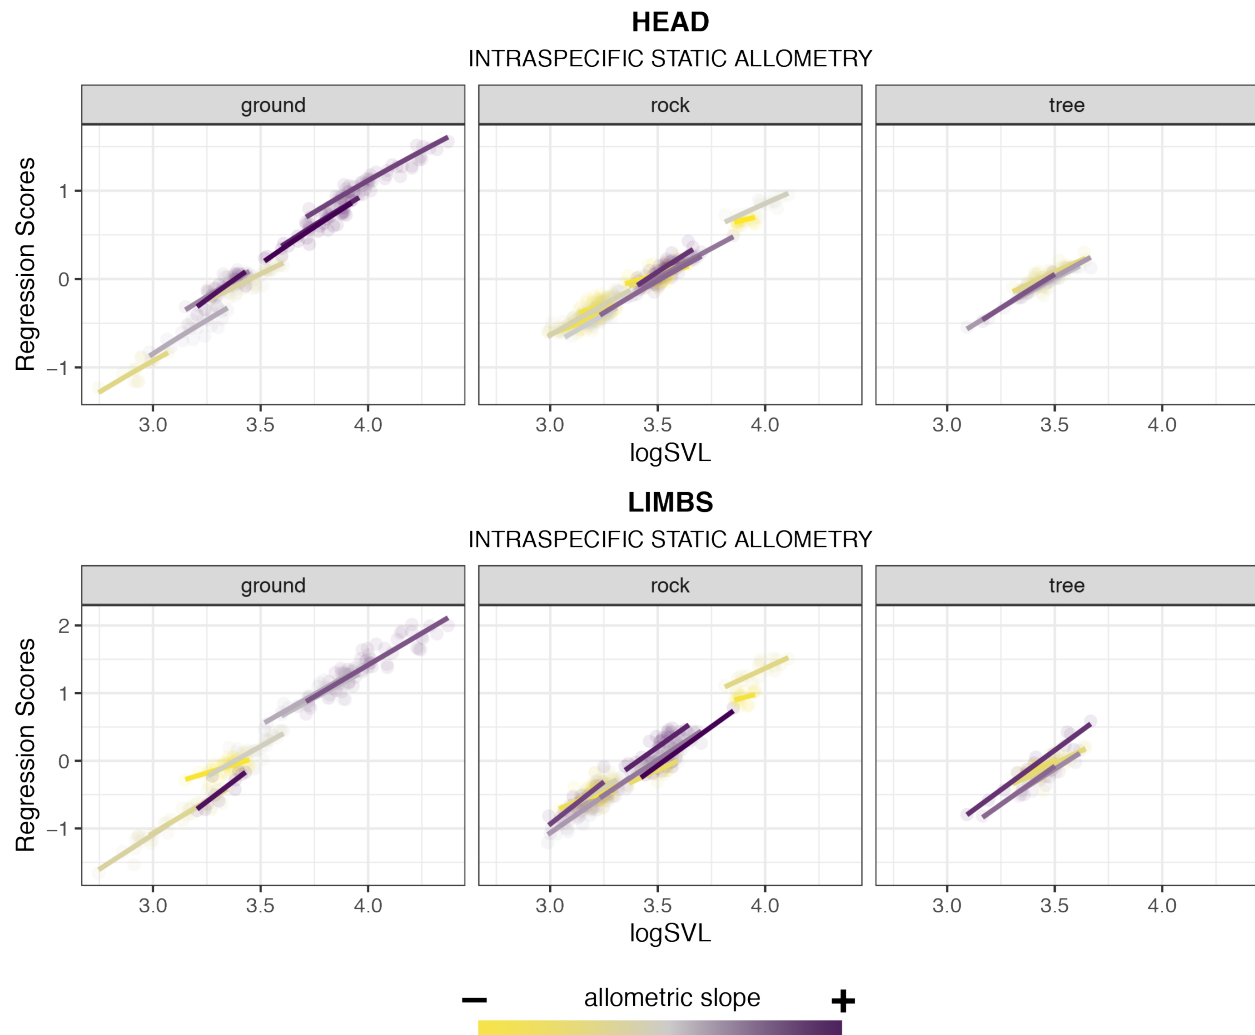

Figure 4: Patterns of static allometry for each species for head traits (upper panel) and limb traits (lower panel). Species are separated by their habitat groups and colored by the magnitude of their regression slope (purple: steeper slopes, yellow: shallower slopes).



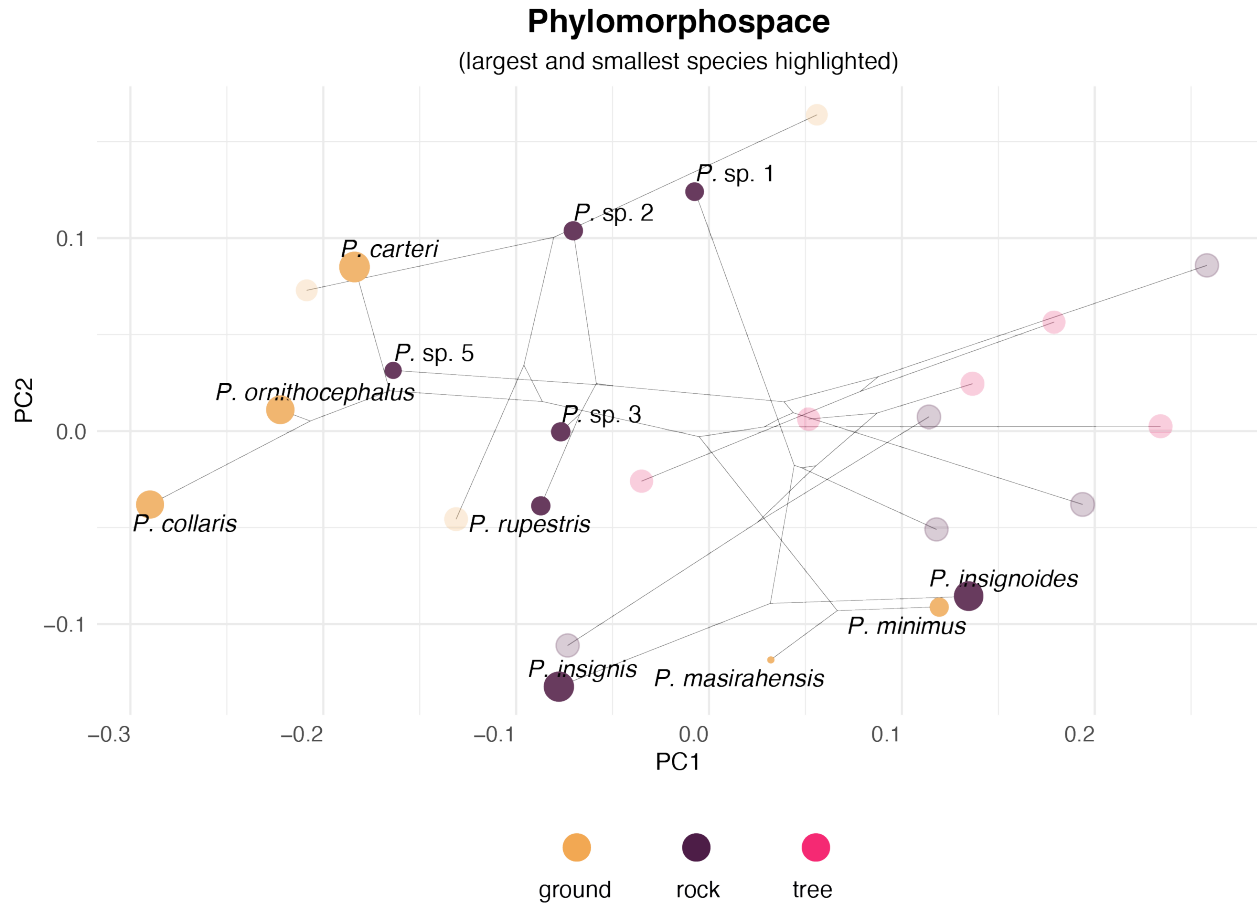

Figure 5: Phylomorphospace of *Pristurus*, based on residuals from a phylogenetic regression of body measurements on size (SVL). Species means are colored by habitat use: ground (beige), rock (dark purple), and tree (magenta). Large and small rock-dwelling and ground-dwelling are highlighted with darker colors to highlight their differentiation and relative positions in morphospace.

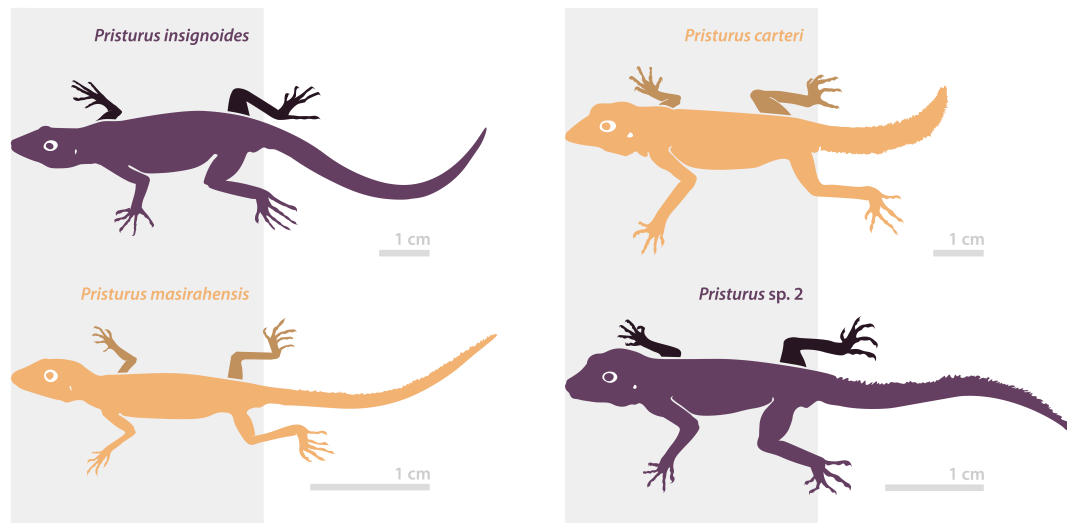

Figure 6: Representative specimens (based on real specimens) from large and small *Pristurus* species, colored by habitat use: ground (beige) and rock (dark purple). Specimens are scaled to a common body size (SVL, gray rectangles) to emphasize the relative differences in limb and head proportions. Relatively slender-headed and short-limbed species shown on the left. Original scale shown as the gray bar.
